# Supplementary material
Source: publisher figshare collection journal article supplement (https://gsapubs.figshare.com/articles/dataset/_/14233571)
Supplement: Supplementary file 1 [file 1]

## Sheet: Table S1
Table S1. Summary of volatile distributions determined while drilling on Expedition 357. Data is from Früh Green et al., 2017 and Früh Green et al., 2018. While the METS sensor is designed to detect CH4 it is will also respond to H2 with a response factor of 1 to 0.02, respectively (Fruh-Green et al., 2018).
	Borehole	Maximum H2 in Rock drill niskin (nM)	Maximum CH4 in Rock drill niskin (nM)	METS Methane Sensor
Western	M0071	61	2	High background concentrations; 77 nM maximum detected
Northwest	M0070	73	5	High background concentrations; 55 nM maximum. Bubbles observed during drilling
Northern	M0074	trace	bdl	Somewhat high background concentrations; maximum of 25 nM
Western	M0073	40	bdl	No anamoulous signals
Eastern	M0068	137	bdl	No anamoulous signals
Eastern	M0075	9	bdl	High background concentrations; 56 nM maximum.
Central	M0069	58	4	No anamoulous signals
Central	M0072	322	3	Low background concentrations; small anomalies while drilling (11 nM maximum)
Central	M0076	no sample	no sample	Small jump on drill touchdown; small anomaly while drilling (13 nM maximum)

## Sheet: Table S2
Table 2. Summary of CTD Rosette cast locations, depths, and associated drill hole and gas data from IODP Expedition 357 (JC130 samples; Fruh-Green et al., 2017) and Lost City 2018 Return (AT42-02 samples; this work). Locations starting with "M" refer to Expedition 357 borehole locations. Altimeter readings only reported when the rosette was <10 m above the seafloor. In cases where CH4 was below t…
			Site	Sample	Altimeter				H2	CH4
Cast#	Location	Bottle #	Depth (m)	Depth (m)	(m)	Date	Latitude	Longitude	(nM)	(nM)		H2/CH4
JC130_001	M068A	1, 5, 9	1001	1099	2.2	2015-11-06	30.1251	-42.0958	6.54933	BDL	>	21.8311
JC130_002	M069A (before drilling)	1, 5, 9	849	847.5	1.7 - 3.0	2015-11-06	30.133	-42.1203	44.3518	BDL	>	147.839
JC130_003	M069A (after drilling)	1	851	847.9	2.1 - 2.7	2015-11-08	30.1325	-42.12	12.4126	1.23766		10.0291
JC130_003	M069A (after drilling)	9	851	848.2	2.1 - 2.7	2015-11-08	30.1325	-42.12	15.8576	1.44532		10.9717
JC130_003	M069A (after drilling)	13	851	848.2	2.1 - 2.7	2015-11-08	30.1325	-42.12	17.4283	0.989795		17.608
JC130_004	M070A	1	1140	1138.4	1.7	2015-11-08	30.1424	-42.1367	9.13408	1.76816		5.16587
JC130_004	M070A	5	1140	1138.4	1.7	2015-11-08	30.1424	-42.1367	8.49304	1.06255		7.99307
JC130_004	M070A	9	1140	1138.4	1.7	2015-11-08	30.1424	-42.1367	9.81357	2.63871		3.71908
JC130_005	M071A	1	1384	1386.8	2.2	2015-11-09	30.1282	-42.1534	10.8905	BDL	>	36.3015
JC130_005	M071A	5	1384	1386.8	2.2	2015-11-09	30.1282	-42.1534	10.7433	BDL	>	35.811
JC130_005	M071A	9	1384	1386.8	2.2	2015-11-09	30.1282	-42.1534	10.5378	BDL	>	35.126
JC130_006	M072A	1	826	818	1.8-2.3	2015-11-10	30.1299	-42.1223	26.2641	1.17026		22.4429
JC130_006	M072A	5	826	818	1.8-2.3	2015-11-10	30.1299	-42.1223	24.5631	BDL	>	81.877
JC130_006	M072A	9	826	818	1.8-2.3	2015-11-10	30.1299	-42.1223	23.8611	1.23426		19.3324
JC130_008	M073A	1	1432	1428	1.5 - 1.8	2015-11-12	30.1312	-42.1824	1.76003	BDL	>	5.86676
JC130_008	M073A	5	1432	1428	1.5 - 1.8	2015-11-12	30.1312	-42.1824	(lost)	BDL
JC130_008	M073A	9	1432	1428	1.5 - 1.8	2015-11-12	30.1312	-42.1824	2.95099	BDL	>	9.83665
JC130_009	M074A	1	1550	1550	1.3	2015-11-13	30.1642	-42.1215	TRACE	BDL
JC130_009	M074A	5	1550	1550	1.3	2015-11-13	30.1642	-42.1215	BDL
JC130_010	M075A	1	1572	1580.5	2.3-4.5	2015-11-14	30.1278	-42.0651	11.1273	BDL	>	37.091
JC130_010	M075A	5	1572	1580.5	2.3-4.5	2015-11-14	30.1278	-42.0651	13.7651	BDL	>	45.8837
JC130_010	M075A	9	1572	1580.5	2.3-4.5	2015-11-14	30.1278	-42.0651	12.7855	BDL	>	42.6182
JC130_11	M075X (Mid-Atlantic Ridge)	1, 5	4217	4221		2015-11-14	30.1081	-42.9978	5.78842	BDL	>	19.2947
JC130_11	M075X (Mid-Atlantic Ridge)	9, 13	4217	4124		2015-11-14	30.1081	-42.9978	5.84542	BDL	>	19.4847
JC130_11	M075X (Mid-Atlantic Ridge)	17, 21	4217	4023		2015-11-14	30.1081	-42.9978	7.25894	BDL	>	24.1965
JC130_12	M075Z (Lost City Plume)	1, 5	821	807		2015-12-01	30.1239	-42.1194	216.779	46.4964		4.66228
JC130_12	M075Z (Lost City Plume)	9, 13	821	802		2015-12-01	30.1239	-42.1194	266.706	47.8911		5.56902
JC130_12	M075Z (Lost City Plume)	17, 21	821	797		2015-12-01	30.1239	-42.1194	195.648	34.6953		5.63903
JC130_007	M072X (Atlantis Fracture Zone)	1	4244	4134		2015-11-11	30.0336	-42.1157	5.30906	BDL	>	17.6969
JC130_007	M072X (Atlantis Fracture Zone)	9	4244	1600.9		2015-11-11	30.0336	-42.1157	4.48684	0.80989		5.54006
JC130_007	M072X (Atlantis Fracture Zone)	17	4244	754.6		2015-11-11	30.0336	-42.1157	4.45665	BDL	>	14.8555
AT4201-001-V01	Background on way to station		5567			2018-09-12	32.827	-55.9476
AT4201-002-T01	Tow N to S along detachment fault	B1	variable	2479	19.84	2018-09-18	30.2402	-42.0699	11.2316	1.54459		7.27157
AT4201-002-T01	Tow N to S along detachment fault	B2	variable	2656.83	30.43	2018-09-18	30.2329	-42.0692	15.0228	2.15771		6.96236
AT4201-002-T01	Tow N to S along detachment fault	B3	variable	2590.68	24.83	2018-09-18	30.2196	-42.0676	13.3239	1.85893		7.1675
AT4201-002-T01	Tow N to S along detachment fault	B4	variable	2602.41	26.42	2018-09-18	30.2028	-42.066	11.4281	1.62548		7.03059
AT4201-002-T01	Tow N to S along detachment fault	B5	variable	2612.59	24.47	2018-09-18	30.1882	-42.0645	15.2011	1.80524		8.42055
AT4201-002-T01	Tow N to S along detachment fault	B7	variable	2713.37	24.8	2018-09-18	30.1694	-42.0626	13.698	1.47249		9.3026
AT4201-002-T01	Tow N to S along detachment fault	B8	variable	750.9	1993.38	2018-09-18	30.1634	-42.062	19.3752	2.16858		8.93452
AT4201-003-V02	Mkr H plume	B1	883	861.101	26.42	2018-09-19	30.1238	-42.1193	2.80496	120.699		0.0232392
AT4201-003-V02	Mkr H plume	B4	883	829.786	45.04	2018-09-19	30.1238	-42.1193	20.9323	222.934		0.0938945
AT4201-003-V02	Mkr 6 plume	B7	786	764.003	45.73	2018-09-19	30.124	-42.1198	850.337	178.158		4.77292
AT4201-003-V02	Poseidon / IMAX plume	B10	789	780.417	9.12	2018-09-19	30.1238	-42.1203	26.873	43.0104		0.624802
AT4201-003-V02	Shallower, above Poseidon/IMAX plume	B13	789	650.163	227.239	2018-09-19	30.1238	-42.1203	0	2.29508		0
AT4201-003-V02	Mkr 8 plume	B16	876	866.172	10.98	2018-09-19	30.1239	-42.1215	0	7.46566		0
AT4201-003-V02	Mkr 8 plume	B19	876	792.749	82.76	2018-09-19	30.1239	-42.1215	24.6135	14.6716		1.67762
AT4201-004-V03	Between Poseidon & Mkr 6	B1	750 to 898	843.204	58.2	2018-09-20	30.124	-42.1189	14.7974	3.29734		4.48767
AT4201-004-V03	Between Poseidon & Mkr 6	B2	750 to 898	800.593	92.08	2018-09-20	30.124	-42.1189	45.9047	5.24361		8.75441
AT4201-004-V03	Between Poseidon & Mkr 6	B3	750 to 898	755.337	146.067	2018-09-20	30.124	-42.1189	246.549	41.1674		5.98894
AT4201-004-V03	Between Poseidon & Mkr 6	B6	750 to 898	708.735	192.669	2018-09-20	30.124	-42.1189	28.4194	5.26743		5.39532
AT4201-004-V03	Between Poseidon & Mkr 6	B7	750 to 898	660.336	241.068	2018-09-20	30.124	-42.1189	26.6423	4.37322		6.09214
AT4201-005-V04	Between Mkrs 8 & 2	B1	814	779.814	25.66	2018-09-20	30.1237	-42.1206	230.625	45.0518		5.1191
AT4201-005-V04	Between Mkrs 8 & 2	B3	814	720.798	94.47	2018-09-20	30.1237	-42.1206	76.0853	10.8409		7.01834
AT4201-005-V04	Between Mkrs 8 & 2	B4	854	820.541	32.94	2018-09-20	30.1236	-42.121	59.1862	24.53		2.41281
AT4201-005-V04	Between Mkrs 8 & 2	B5	854	762.655	92.1	2018-09-20	30.1236	-42.121	285.73	50.4005		5.66918
AT4201-005-V04	Between Mkrs 8 & 2	B6	892	885.411	7.42	2018-09-20	30.1236	-42.1215	14.55	2.39704		6.06998
AT4201-005-V04	Between Mkrs 8 & 2	B8	892	850.529	37.85	2018-09-20	30.1236	-42.1215	17.1399	6.6409		2.58096
AT4201-005-V04	Between Mkrs 8 & 2	B9	892	761.871	70.37	2018-09-20	30.1236	-42.1215	167.346	32.5835		5.13592
AT4201-005-V04	Between Mkrs 8 & 2	B10	892	713.224	71.44	2018-09-20	30.1236	-42.1215	19.042	3.70894		5.13408
AT4201-006-V05	Eastern Wall Cast #1	B1	913	904.089	11.19	2018-09-22	30.1245	-42.118	18.7121	5.3949		3.46847
AT4201-006-V05	Eastern Wall Cast #1	B2	913	890.344	26.76	2018-09-22	30.1245	-42.118	20.6723	20.3837		1.01416
AT4201-006-V05	Eastern Wall Cast #1	B3	913	879.666	37.91	2018-09-22	30.1245	-42.118	40.8296	10.5555		3.86809
AT4201-006-V05	Eastern Wall Cast #1	B4	913	869.947	48.66	2018-09-22	30.1245	-42.118	14.1865	3.45614		4.10472
AT4201-006-V05	Eastern Wall Cast #1	B5	913	860.774	59.51	2018-09-22	30.1245	-42.118	12.2331	3.70689		3.3001
AT4201-006-V05	Eastern Wall Cast #1	B6	913	850.863	65.39	2018-09-22	30.1245	-42.118	21.7123	3.76613		5.76515
AT4201-006-V05	Eastern Wall Cast #1	B7	913	840.356	76.27	2018-09-22	30.1245	-42.118	14.6309	6.18234		2.36657
AT4201-006-V05	Eastern Wall Cast #1	B8	913	830.377	85.87	2018-09-22	30.1245	-42.118	23.8089	9.12126		2.61026
AT4201-006-V05	Eastern Wall Cast #1	B9	913	820.618	93.39	2018-09-22	30.1245	-42.118	18.4822	7.82308		2.36252
AT4201-006-V05	Eastern Wall Cast #1	B10	913	810.22	105.059	2018-09-22	30.1245	-42.118	25.4138	8.4391		3.01143
AT4201-006-V05	Eastern Wall Cast #1	B11	913	800.617	114.662	2018-09-22	30.1245	-42.118	31.7471	9.1855		3.45621
AT4201-006-V05	Eastern Wall Cast #1	B12	913	790.646	124.633	2018-09-22	30.1245	-42.118	60.2874	12.371		4.8733
AT4201-006-V05	Eastern Wall Cast #1	B13	913	780.896	134.383	2018-09-22	30.1245	-42.118	48.3925	10.1606		4.76274
AT4201-006-V05	Eastern Wall Cast #1	B14	913	770.889	144.39	2018-09-22	30.1245	-42.118	113.711	17.9458		6.33632
AT4201-006-V05	Eastern Wall Cast #1	B15	913	761.247	154.032	2018-09-22	30.1245	-42.118	119.207	16.4681		7.23867
AT4201-006-V05	Eastern Wall Cast #1	B16	913	750.497	164.782	2018-09-22	30.1245	-42.118	36.8229	5.02075		7.33414
AT4201-006-V05	Eastern Wall Cast #1	B17	913	740.693	174.586	2018-09-22	30.1245	-42.118	45.1203	3.61298		12.4884
AT4201-006-V05	Eastern Wall Cast #1	B18	913	730.703	184.576	2018-09-22	30.1245	-42.118	19.9427
AT4201-006-V05	Eastern Wall Cast #1	B19	913	720.49	194.789	2018-09-22	30.1245	-42.118	21.5988	2.43763		8.86059
AT4201-006-V05	Eastern Wall Cast #1	B20	913	701.02	214.259	2018-09-22	30.1245	-42.118	58.018	6.90472		8.40266
AT4201-006-V05	Eastern Wall Cast #1	B21	913	681.003	234.276	2018-09-22	30.1245	-42.118	20.7599	2.38283		8.71232
AT4201-006-V05	Eastern Wall Cast #1	B22	913	660.438	254.841	2018-09-22	30.1245	-42.118	11.9774	2.51132		4.76937
AT4201-006-V05	Eastern Wall Cast #1	B23	913	640.614	274.665	2018-09-22	30.1245	-42.118	20.1173	3.28607		6.122
AT4201-006-V05	Eastern Wall Cast #1	B24	913	621.008	294.271	2018-09-22	30.1245	-42.118	12.4107	1.97089		6.29703
AT4201-007-V06	Corner of AFZ and MAR	B1	4848	4827.07	20.66	2018-09-22	30.0432	-42.0545	2.51272	0.738572		3.40214
AT4201-007-V06	Corner of AFZ and MAR	B2	4848	4400.01	447.712	2018-09-22	30.0432	-42.0545	1.21601	0.393315		3.0917
AT4201-007-V06	Corner of AFZ and MAR	B3	4848	3999.37	848.352	2018-09-22	30.0432	-42.0545	6.5226	8.01796		0.813498
AT4201-007-V06	Corner of AFZ and MAR	B4	4848	3001.43	1846.3	2018-09-22	30.0432	-42.0545	7.63799	0.30722		24.8616
AT4201-007-V06	Corner of AFZ and MAR	B5	4848	2000.05	2847.67	2018-09-22	30.0432	-42.0545	5.99226	1.71063		3.50295
AT4201-007-V06	Corner of AFZ and MAR	B6	4848	1000.5	3847.22	2018-09-22	30.0432	-42.0545	6.41501	0.78675		8.15381
AT4201-007-V06	Corner of AFZ and MAR	B7	4848	800.997	4046.73	2018-09-22	30.0432	-42.0545	5.90775	0.901157		6.55573
AT4201-007-V06	Corner of AFZ and MAR	B12	4848	750.135	4097.59	2018-09-22	30.0432	-42.0545	8.43599	1.44935		5.82053
AT4201-007-V06	Corner of AFZ and MAR	B13	4848	700.928	4146.8	2018-09-22	30.0432	-42.0545	3.72131	18.0631		0.206017
AT4201-008-V07	Fault east of Sister massif	B1	2372	2351.89	21.2	2018-09-22	29.9182	-42.4156	3.70497	0.933478		3.96899
AT4201-008-V07	Fault east of Sister massif	B2	2372	1265.81	1107.28	2018-09-22	29.9182	-42.4156	3.77812	1.02035		3.70278
AT4201-009-V08	Sister Massif	B1	1568	1548.3	21.35	2018-09-22	29.9364	-42.4647	2.65977	1.70643		1.55868
AT4201-009-V08	Sister Massif	B2	1568	1450.06	119.592	2018-09-22	29.9364	-42.4647	1.166	0.338459		3.44504
AT4201-009-V08	Sister Massif	B3	1568	1350.14	219.513	2018-09-22	29.9364	-42.4647	4.63648	0.377753		12.2739
AT4201-009-V08	Sister Massif	B4	1568	1300.32	269.337	2018-09-22	29.9364	-42.4647	0.765205	0.281465		2.71865
AT4201-009-V08	Sister Massif	B5	1568	1250.25	319.405	2018-09-22	29.9364	-42.4647	0.794169	0.290608		2.73279
AT4201-009-V08	Sister Massif	B6	1568	1201.33	368.323	2018-09-22	29.9364	-42.4647	0.983799	0.378274		2.60076
AT4201-009-V08	Sister Massif	B7	1568	1150.18	419.47	2018-09-22	29.9364	-42.4647	1.09842	0.297201		3.69588
AT4201-009-V08	Sister Massif	B8	1568	1100.32	469.335	2018-09-22	29.9364	-42.4647	1.05151	0.418914		2.51008
AT4201-010-V09	Eastern Wal Cast #2	B1	919	908.782	9.45	2018-09-23	30.1259	-42.1157	3.47065	0.486019		7.14097
AT4201-010-V09	Eastern Wal Cast #2	B2	919	887.754	21.8	2018-09-23	30.1259	-42.1157	3.89902	0.918781		4.24369
AT4201-010-V09	Eastern Wal Cast #2	B3	919	874.125	31.33	2018-09-23	30.1259	-42.1157	5.05014	1.48139		3.40905
AT4201-010-V09	Eastern Wal Cast #2	B4	919	870.969	27.94	2018-09-23	30.1259	-42.1157	1.94563	1.03529		1.87931
AT4201-010-V09	Eastern Wal Cast #2	B5	919	861.267	27.92	2018-09-23	30.1259	-42.1157	3.64836	2.77433		1.31504
AT4201-010-V09	Eastern Wal Cast #2	B6	919	850.577	35.05	2018-09-23	30.1259	-42.1157	5.37646	2.39847		2.24162
AT4201-010-V09	Eastern Wal Cast #2	B7	919	840.483	47.09	2018-09-23	30.1259	-42.1157	8.70201	4.88081		1.7829
AT4201-010-V09	Eastern Wal Cast #2	B8	919	829.834	61.86	2018-09-23	30.1259	-42.1157	4.54897	2.7687		1.643
AT4201-010-V09	Eastern Wal Cast #2	B9	919	820.431	77.3	2018-09-23	30.1259	-42.1157	6.25552	6.62689		0.94396
AT4201-010-V09	Eastern Wal Cast #2	B10	919	809.832	92.26	2018-09-23	30.1259	-42.1157	7.68665	2.70825		2.83823
AT4201-010-V09	Eastern Wal Cast #2	B11	919	801.34	99.69	2018-09-23	30.1259	-42.1157	19.8552	4.66784		4.25362
AT4201-010-V09	Eastern Wal Cast #2	B12	919	789.97	128.262	2018-09-23	30.1259	-42.1157	37.0893	10.0216		3.70093
AT4201-010-V09	Eastern Wal Cast #2	B13	919	779.898	138.334	2018-09-23	30.1259	-42.1157	40.7246	9.20149		4.42587
AT4201-010-V09	Eastern Wal Cast #2	B14	919	770.372	147.86	2018-09-23	30.1259	-42.1157	11.0265	3.17263		3.47552
AT4201-010-V09	Eastern Wal Cast #2	B15	919	760.355	157.877	2018-09-23	30.1259	-42.1157	25.8703	3.38371		7.64553
AT4201-010-V09	Eastern Wal Cast #2	B16	919	750.045	168.187	2018-09-23	30.1259	-42.1157	18.5282	2.44459		7.57926
AT4201-010-V09	Eastern Wal Cast #2	B17	919	739.842	178.39	2018-09-23	30.1259	-42.1157	15.4579	2.01174		7.68386
AT4201-010-V09	Eastern Wal Cast #2	B18	919	729.591	188.641	2018-09-23	30.1259	-42.1157	3.27229	0.93756		3.49022
AT4201-010-V09	Eastern Wal Cast #2	B19	919	719.401	198.831	2018-09-23	30.1259	-42.1157	9.45643	1.3242		7.14125
AT4201-010-V09	Eastern Wal Cast #2	B20	919	700.065	218.167	2018-09-23	30.1259	-42.1157	2.18063	0.790116		2.75989
AT4201-010-V09	Eastern Wal Cast #2	B21	919	680.727	237.505	2018-09-23	30.1259	-42.1157	1.98217	1.08186		1.83219
AT4201-010-V09	Eastern Wal Cast #2	B22	919	660.566	257.666	2018-09-23	30.1259	-42.1157	1.98192	1.2408		1.59729
AT4201-010-V09	Eastern Wal Cast #2	B23	919	640.588	277.644	2018-09-23	30.1259	-42.1157	1.98178	5.54599		0.357336
AT4201-011-V10	Eastern Wall Cast #3	B1	917	890.756	17.72	2018-09-23	30.1265	-42.1134	0.911844	0.617944		1.47561
AT4201-011-V10	Eastern Wall Cast #3	B2	917	880.131	25.78	2018-09-23	30.1265	-42.1134	0.823815	2.0668		0.398595
AT4201-011-V10	Eastern Wall Cast #3	B3	917	870.935	35.58	2018-09-23	30.1265	-42.1134	1.04157	0.638308		1.63177
AT4201-011-V10	Eastern Wall Cast #3	B4	917	860.414	49.87	2018-09-23	30.1265	-42.1134	1.00839	1.60805		0.627089
AT4201-011-V10	Eastern Wall Cast #3	B5	917	850.459	67.34	2018-09-23	30.1265	-42.1134	1.16554	1.35353		0.861106
AT4201-011-V10	Eastern Wall Cast #3	B6	917	840.561	73.07	2018-09-23	30.1265	-42.1134	1.40359	1.07745		1.30269
AT4201-011-V10	Eastern Wall Cast #3	B7	917	830.356	81.3	2018-09-23	30.1265	-42.1134	2.26767	2.22024		1.02136
AT4201-011-V10	Eastern Wall Cast #3	B8	917	820.42	91.38	2018-09-23	30.1265	-42.1134	0.899792	0.653574		1.37673
AT4201-011-V10	Eastern Wall Cast #3	B9	917	810.199	99.61	2018-09-23	30.1265	-42.1134	0.565363	0.438927		1.28806
AT4201-011-V10	Eastern Wall Cast #3	B10	917	800.181	108.295	2018-09-23	30.1265	-42.1134	1.50672	0.437577		3.44333
AT4201-011-V10	Eastern Wall Cast #3	B11	917	790.487	117.989	2018-09-23	30.1265	-42.1134	1.13373	0.568558		1.99405
AT4201-011-V10	Eastern Wall Cast #3	B12	917	780.231	128.245	2018-09-23	30.1265	-42.1134	1.04801	1.18032		0.887904
AT4201-011-V10	Eastern Wall Cast #3	B13	917	770.205	138.271	2018-09-23	30.1265	-42.1134	1.16854	0.547935		2.13263
AT4201-011-V10	Eastern Wall Cast #3	B14	917	759.871	148.605	2018-09-23	30.1265	-42.1134	1.21763	0.540766		2.25167
AT4201-011-V10	Eastern Wall Cast #3	B15	917	750.048	158.428	2018-09-23	30.1265	-42.1134	1.83624	0.722526		2.54141
AT4201-011-V10	Eastern Wall Cast #3	B16	917	740.081	168.395	2018-09-23	30.1265	-42.1134	1.72706	0.58382		2.95821
AT4201-011-V10	Eastern Wall Cast #3	B17	917	730.563	177.913	2018-09-23	30.1265	-42.1134	17.5967	2.50516		7.02418
AT4201-011-V10	Eastern Wall Cast #3	B18	917	730.64	177.836	2018-09-23	30.1265	-42.1134	19.6173	2.68485		7.30667
AT4201-011-V10	Eastern Wall Cast #3	B19	917	720.454	188.022	2018-09-23	30.1265	-42.1134	10.7086	1.5641		6.84648
AT4201-011-V10	Eastern Wall Cast #3	B20	917	700.248	208.228	2018-09-23	30.1265	-42.1134	0.948408	0.655994		1.44576
AT4201-011-V10	Eastern Wall Cast #3	B21	917	680.636	227.84	2018-09-23	30.1265	-42.1134	0.997951	2.18453		0.456826
AT4201-011-V10	Eastern Wall Cast #3	B22	917	660.069	248.407	2018-09-23	30.1265	-42.1134	1.83888	0.769069		2.39104
AT4201-011-V10	Eastern Wall Cast #3	B23	917	640.477	267.999	2018-09-23	30.1265	-42.1134	1.99787	2.93139		0.681542
AT4201-012-V11	Eastern Wall Cast #4	B1	932	918.155	14.28	2018-09-23	30.1255	-42.1101	0.390108	0.644024		0.605734
AT4201-012-V11	Eastern Wall Cast #4	B2	932	890.748	43.56	2018-09-23	30.1255	-42.1101	0.726354	0.719385		1.00969
AT4201-012-V11	Eastern Wall Cast #4	B3	932	881.043	51.03	2018-09-23	30.1255	-42.1101	1.18775	0.80246		1.48013
AT4201-012-V11	Eastern Wall Cast #4	B4	932	870.59	65.21	2018-09-23	30.1255	-42.1101	1.96782	1.61891		1.21552
AT4201-012-V11	Eastern Wall Cast #4	B5	932	860.923	71.48	2018-09-23	30.1255	-42.1101	1.76712	1.86982		0.945079
AT4201-012-V11	Eastern Wall Cast #4	B6	932	850.94	73.8	2018-09-23	30.1255	-42.1101	1.28781	2.05781		0.625813
AT4201-012-V11	Eastern Wall Cast #4	B7	932	840.442	80.4	2018-09-23	30.1255	-42.1101	1.15871	1.04131		1.11274
AT4201-012-V11	Eastern Wall Cast #4	B8	932	830.723	86.51	2018-09-23	30.1255	-42.1101	1.40012	1.6202		0.864163
AT4201-012-V11	Eastern Wall Cast #4	B9	932	820.446	97.27	2018-09-23	30.1255	-42.1101	2.2683	1.20454		1.88312
AT4201-012-V11	Eastern Wall Cast #4	B10	932	810.579	98.51	2018-09-23	30.1255	-42.1101	0.710163	0.28432		2.49776
AT4201-012-V11	Eastern Wall Cast #4	B11	932	800.467	131.968	2018-09-23	30.1255	-42.1101	0.832916	0.482519		1.72618
AT4201-012-V11	Eastern Wall Cast #4	B12	932	791.39	141.045	2018-09-23	30.1255	-42.1101	0.780451	0.364682		2.14009
AT4201-012-V11	Eastern Wall Cast #4	B13	932	781.229	151.206	2018-09-23	30.1255	-42.1101	1.43639	0.438146		3.27834
AT4201-012-V11	Eastern Wall Cast #4	B14	932	770.305	162.13	2018-09-24	30.1255	-42.1101	0.559294	0.785987		0.711581
AT4201-012-V11	Eastern Wall Cast #4	B15	932	760.981	171.454	2018-09-24	30.1255	-42.1101	1.49704	1.25043		1.19722
AT4201-012-V11	Eastern Wall Cast #4	B16	932	750.29	182.145	2018-09-24	30.1255	-42.1101	1.3218	0.489857		2.69833
AT4201-012-V11	Eastern Wall Cast #4	B17	932	741.108	191.327	2018-09-24	30.1255	-42.1101	1.29971	0.506113		2.56802
AT4201-012-V11	Eastern Wall Cast #4	B18	932	731.4	201.035	2018-09-24	30.1255	-42.1101	2.56502	0.677393		3.78661
AT4201-012-V11	Eastern Wall Cast #4	B19	932	720.633	211.802	2018-09-24	30.1255	-42.1101	3.46307	0.741074		4.67304
AT4201-012-V11	Eastern Wall Cast #4	B20	932	700.944	231.491	2018-09-24	30.1255	-42.1101	1.02524	0.642804		1.59496
AT4201-012-V11	Eastern Wall Cast #4	B21	932	680.763	251.672	2018-09-24	30.1255	-42.1101	0.665228	1.30463		0.509897
AT4201-012-V11	Eastern Wall Cast #4	B22	932	660.669	271.766	2018-09-24	30.1255	-42.1101	1.37196	0.966019		1.42022
AT4201-012-V11	Eastern Wall Cast #4	B23	932	640.443	291.992	2018-09-24	30.1255	-42.1101	0.81183	1.18026		0.687841
AT4201-013-V12	Eastern Wall Cast #5	B1	1007	989.912	17.53	2018-09-24	30.1225	-42.1186	0.377046	0.642349		0.586981
AT4201-013-V12	Eastern Wall Cast #5	B2	1007	891.353	116.089	2018-09-24	30.1225	-42.1186	1.24335	0.526849		2.35997
AT4201-013-V12	Eastern Wall Cast #5	B3	1007	880.42	127.022	2018-09-24	30.1225	-42.1186	1.50367	0.779905		1.92801
AT4201-013-V12	Eastern Wall Cast #5	B4	1007	870.689	136.753	2018-09-24	30.1225	-42.1186	2.04589	10.9993		0.186002
AT4201-013-V12	Eastern Wall Cast #5	B5	1007	860.319	147.123	2018-09-24	30.1225	-42.1186	2.36617	4.06657		0.581858
AT4201-013-V12	Eastern Wall Cast #5	B6	1007	851.384	156.058	2018-09-24	30.1225	-42.1186	6.46301	3.95098		1.6358
AT4201-013-V12	Eastern Wall Cast #5	B7	1007	842.185	165.257	2018-09-24	30.1225	-42.1186	5.25238	6.12724		0.857218
AT4201-013-V12	Eastern Wall Cast #5	B8	1007	830.009	177.433	2018-09-24	30.1225	-42.1186	10.4669	7.05009		1.48465
AT4201-013-V12	Eastern Wall Cast #5	B9	1007	820.332	187.11	2018-09-24	30.1225	-42.1186	8.93753	9.43523		0.947251
AT4201-013-V12	Eastern Wall Cast #5	B10	1007	810.256	197.186	2018-09-24	30.1225	-42.1186	12.0755	7.99845		1.50973
AT4201-013-V12	Eastern Wall Cast #5	B11	1007	801.244	206.198	2018-09-24	30.1225	-42.1186	19.7661	7.52524		2.62664
AT4201-013-V12	Eastern Wall Cast #5	B12	1007	791.34	216.102	2018-09-24	30.1225	-42.1186	27.0876	5.36182		5.05194
AT4201-013-V12	Eastern Wall Cast #5	B13	1007	781.387	226.055	2018-09-24	30.1225	-42.1186	41.0554	7.79396		5.26759
AT4201-013-V12	Eastern Wall Cast #5	B14	1007	770.74	236.702	2018-09-24	30.1225	-42.1186	126.063	21.5289		5.85553
AT4201-013-V12	Eastern Wall Cast #5	B15	1007	761.198	246.244	2018-09-24	30.1225	-42.1186	28.4336	4.59229		6.1916
AT4201-013-V12	Eastern Wall Cast #5	B16	1007	750.702	256.74	2018-09-24	30.1225	-42.1186	21.3954	4.93629		4.3343
AT4201-013-V12	Eastern Wall Cast #5	B17	1007	740.29	267.152	2018-09-24	30.1225	-42.1186	7.40804	1.97039		3.75969
AT4201-013-V12	Eastern Wall Cast #5	B18	1007	730.36	277.082	2018-09-24	30.1225	-42.1186	4.12758	0.942799		4.37801
AT4201-013-V12	Eastern Wall Cast #5	B19	1007	720.558	286.884	2018-09-24	30.1225	-42.1186	1.24189	0.775119		1.60219
AT4201-013-V12	Eastern Wall Cast #5	B20	1007	700.498	306.944	2018-09-24	30.1225	-42.1186	30.6959	4.01711		7.64127
AT4201-013-V12	Eastern Wall Cast #5	B21	1007	680.406	327.036	2018-09-24	30.1225	-42.1186	1.1221	1.61756		0.6937
AT4201-013-V12	Eastern Wall Cast #5	B22	1007	651.345	356.097	2018-09-24	30.1225	-42.1186	1.01039	0.880318		1.14776
AT4201-013-V12	Eastern Wall Cast #5	B23	1007	6.096	1001.35	2018-09-24	30.1225	-42.1186	1.24206	1.91005		0.650275

## Sheet: G48322
Lang, S.Q., et al., 2021, Extensive decentralized hydrogen export from the Atlantis Massif: Geology, v. 49, https://doi.org/10.1130/G48322.1
